# Supplementary material for: Early prediction of spontaneous Patent Ductus Arteriosus (PDA) closure and PDA-associated outcomes: a prospective cohort investigation
Source: PubMed Central journal article supplement (PMC6743099; doi:10.1186/s12887-019-1708-z), 2019-09-13
Supplement: 12887_2019_1708_MOESM1_ESM.pdf [file 12887_2019_1708_MOESM1_ESM.pdf]

## Supplementary Appendix

### Early Prediction of Spontaneous Patent Ductus Arteriosus (PDA) Closure and PDA-Associated Outcomes: A Prospective Cohort Investigation

JL Slaughter, CL Cua, JL Notestine, BK Rivera, L Marzec, EM Hade, NL Maitre,  
MA Klebanoff, M Ilgenfritz, VT Le, DJ Lewandowski, CH Backes

**Supplemental Table 1. World Health Organization Trial Registration Data Set**

| Data category                                 | Information                                                                                                                                                                                                                                                                                                                                                                                                                     |
|-----------------------------------------------|---------------------------------------------------------------------------------------------------------------------------------------------------------------------------------------------------------------------------------------------------------------------------------------------------------------------------------------------------------------------------------------------------------------------------------|
| Primary registry and trial identifying number | ClinicalTrials.gov<br>NCT03782610                                                                                                                                                                                                                                                                                                                                                                                               |
| Date of registration in primary registry      | 20 December, 2018                                                                                                                                                                                                                                                                                                                                                                                                               |
| Secondary identifying numbers                 | IRB18-00684, 1800684, R01HL145032                                                                                                                                                                                                                                                                                                                                                                                               |
| Source(s) of monetary or material support     | National Heart, Lung, and Blood Institute of the National Institutes of Health (U.S.)                                                                                                                                                                                                                                                                                                                                           |
| Primary sponsor                               | National Heart, Lung, and Blood Institute                                                                                                                                                                                                                                                                                                                                                                                       |
| Secondary sponsor(s)                          | Not Applicable                                                                                                                                                                                                                                                                                                                                                                                                                  |
| Contact for public queries                    | CB, MD [email address]                                                                                                                                                                                                                                                                                                                                                                                                          |
| Contact for scientific queries                | CB, MD Department of Pediatrics, Nationwide Children's Hospital, Columbus, Ohio, USA                                                                                                                                                                                                                                                                                                                                            |
| Public title                                  | Patent Ductus Arteriosus (PDA) Prediction Study                                                                                                                                                                                                                                                                                                                                                                                 |
| Scientific title                              | Early Prediction of Spontaneous Patent Ductus Arteriosus (PDA) Closure and PDA-Associated Outcomes                                                                                                                                                                                                                                                                                                                              |
| Countries of recruitment                      | United States                                                                                                                                                                                                                                                                                                                                                                                                                   |
| Health condition(s) or problem(s) studied     | Patent ductus arteriosus                                                                                                                                                                                                                                                                                                                                                                                                        |
| Intervention(s)                               | Not Applicable                                                                                                                                                                                                                                                                                                                                                                                                                  |
| Key inclusion and exclusion criteria          | Ages eligible for study: up to 72 hours (child); Sexes eligible for study: all;<br>Accepts healthy volunteers: no<br>Inclusion criteria:<br>Infants born between 23-weeks + 0 days (23 <sup>0/7</sup> weeks) and 29 <sup>6/7</sup> weeks of gestation, inclusive;<br>Admitted to a study network neonatal intensive care unit within 72-hours of birth;<br>PDA noted on initial screening echocardiogram at <72 postnatal hours |

|                         |                                                                                                                                                                                                                                                                                                                                                                                                                                                                                                                                                                                                                                                                                                                                   |
|-------------------------|-----------------------------------------------------------------------------------------------------------------------------------------------------------------------------------------------------------------------------------------------------------------------------------------------------------------------------------------------------------------------------------------------------------------------------------------------------------------------------------------------------------------------------------------------------------------------------------------------------------------------------------------------------------------------------------------------------------------------------------|
| Study type              | <p>Exclusion criteria:<br/> Life-threatening congenital abnormalities including congenital heart disease (other than PDA or small atrial septal defects/patent foramen ovale/muscular ventriculoseptal defects);<br/> Infants whose parents have chosen to allow natural death (do not resuscitate order)</p> <p>Observational (Patient Registry)<br/> Observational model: Cohort<br/> Primary purpose: Estimate probability of spontaneous PDA closure and predict the timing of ductal closure using clinical and echocardiographic predictors within the first postnatal month.</p>                                                                                                                                           |
| Date of first enrolment | April 2019                                                                                                                                                                                                                                                                                                                                                                                                                                                                                                                                                                                                                                                                                                                        |
| Target sample size      | 675                                                                                                                                                                                                                                                                                                                                                                                                                                                                                                                                                                                                                                                                                                                               |
| Recruitment status      | Recruiting                                                                                                                                                                                                                                                                                                                                                                                                                                                                                                                                                                                                                                                                                                                        |
| Primary outcome(s)      | <ol style="list-style-type: none"> <li>1. PDA closure documented via echo by 36-weeks PMA (binary) [Time Frame: Outcome will be documented between &lt;72-hour screening echo and 36-weeks PMA.]</li> <li>2. Mortality or supplemental oxygen or positive-pressure respiratory support at 36-weeks PMA (binary) [Time Frame: Outcome will be documented between &lt;72-hour screening echo and 36-weeks PMA]</li> <li>3. Composite Bayley III Motor Score at 22-26 months CA (continuous). [Time Frame: Bayley III Score Testing will occur at 22 to 26-months CA]</li> </ol>                                                                                                                                                     |
| Key secondary outcomes  | <ol style="list-style-type: none"> <li>1. Mortality by 36-weeks PMA (binary) [Time Frame: Death occurring between 72-hours postnatal and 36-weeks PMA]</li> <li>2. Bayley III Gross Motor Development Scaled Standard Score at 22-26 months CA (continuous) [Time Frame: Recorded at 22-26 months CA]</li> <li>3. Bayley III Fine Motor Development Scaled Standard Score postnatal age at 22-26 months CA (continuous) [Time Frame: Recorded at 22-26 months CA]</li> <li>4. Bayley III Cognitive Composite Score at 22-26 months CA (continuous) [Time Frame: Recorded at 22-26 months CA]</li> <li>5. Bayley III Language Composite Score at 22-26 months CA (continuous) [Time Frame: Recorded at 22-26 months CA]</li> </ol> |

---

Bayley III, Bayley Scales of Infant and Toddler Development 3<sup>rd</sup> Edition; CA, corrected age (age since birth - number of weeks born before 40-weeks gestation); PDA, patent ductus arteriosus; PMA, postmenstrual age
